# Supplementary figures and images for: Chief cell plasticity is the origin of metaplasia following acute injury in the stomach mucosa
Source: HighWire-hosted journal article supplement (doi:10.1136/gutjnl-2021-325310), 2021-09-08

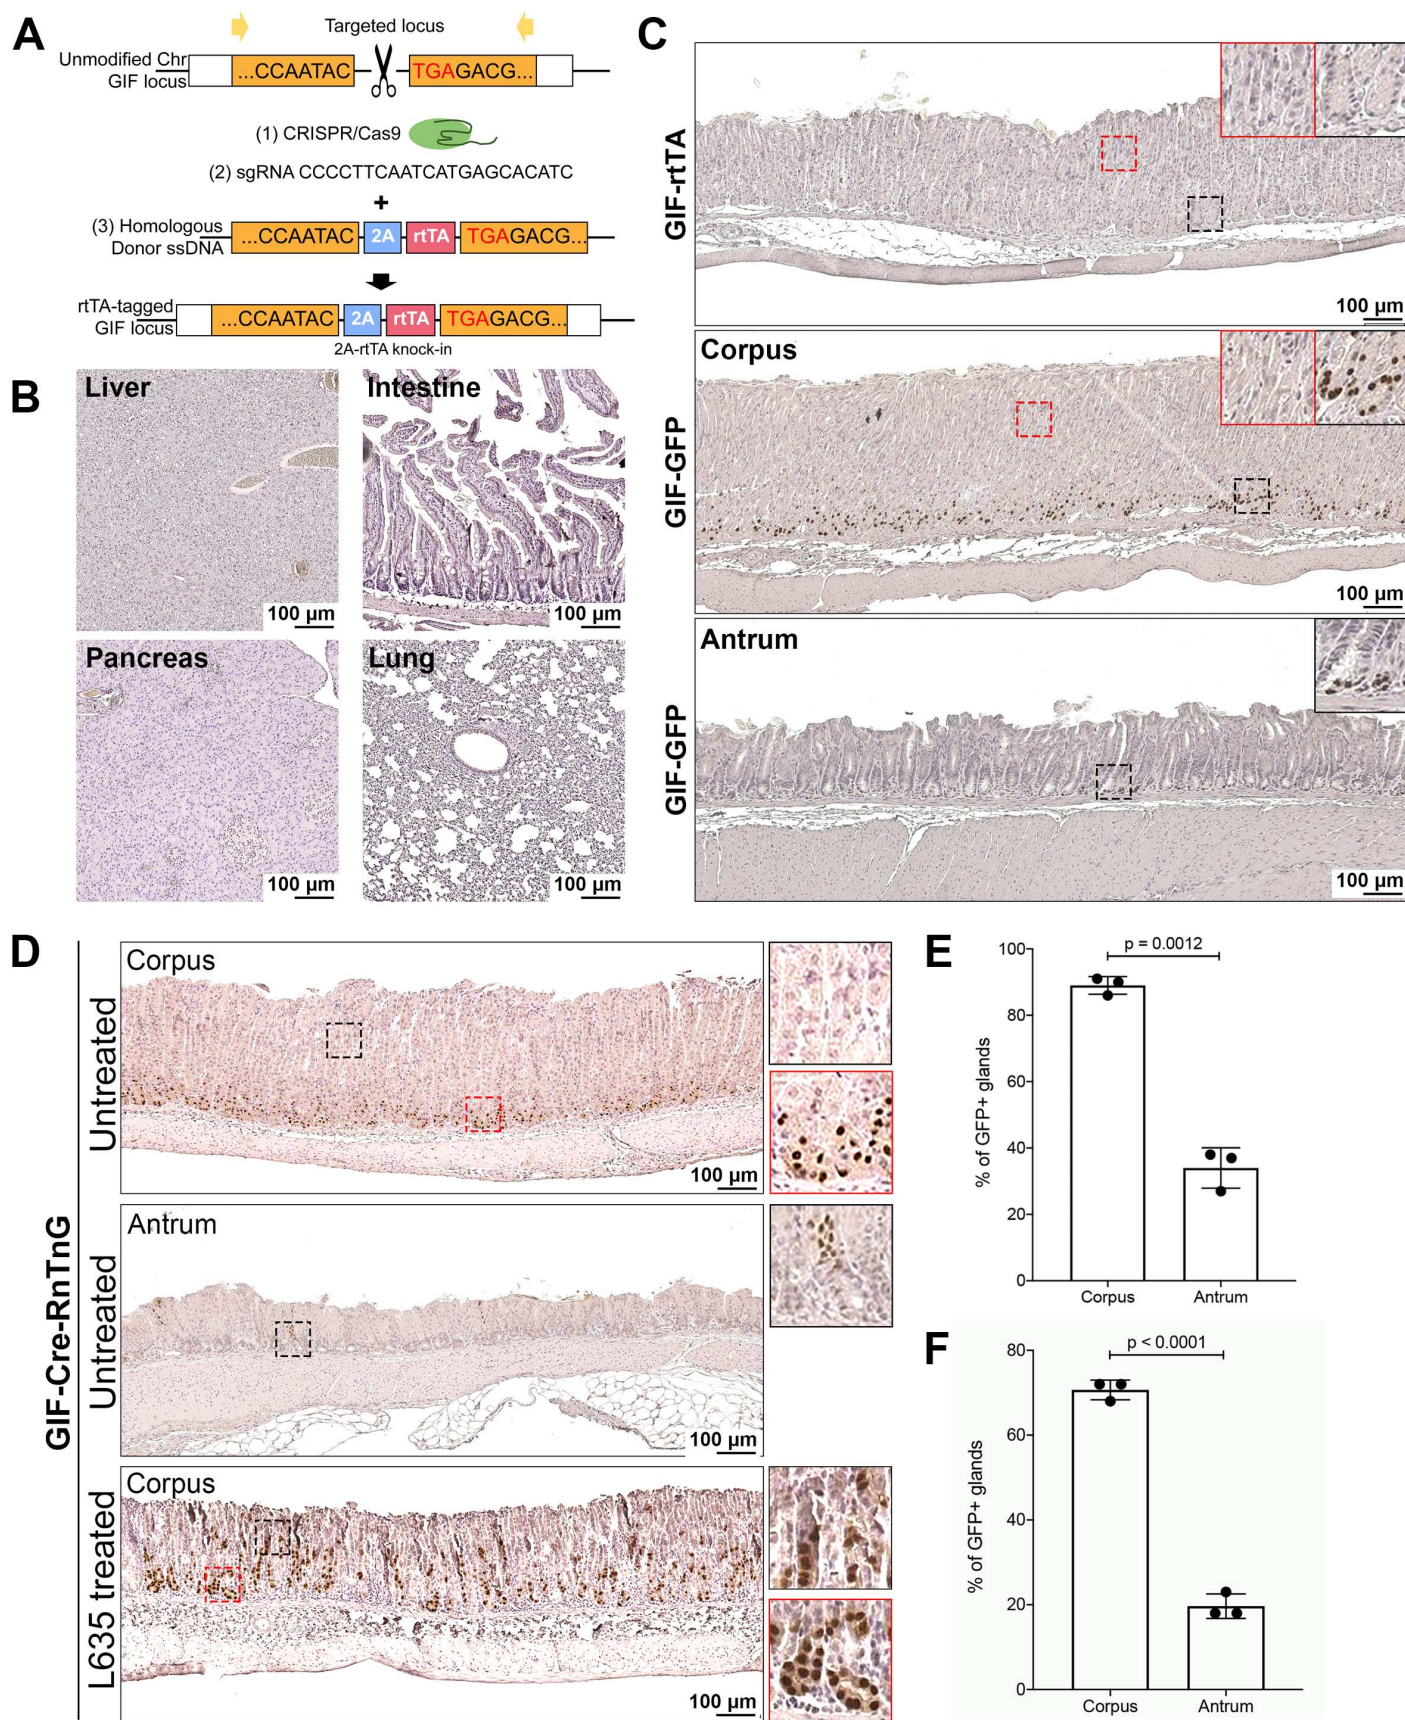

Supplement: gutjnl-2021-325310supp001_data_supplement.pdf [file gutjnl-2021-325310supp001_data_supplement.pdf]
